# Supplementary material for: Chromoblastomycosis in an Endemic Area of Brazil: A Clinical-Epidemiological Analysis and a Worldwide Haplotype Network
Source: PubMed Central journal article supplement (PMC7711792; doi:10.3390/jof6040204), 2020-10-03
Supplement: jof-06-00204-s001.pdf [file jof-06-00204-s001.pdf]

Table S1. Strains of *Fonsecaea* spp. involved in the ITS world haplotype network and their global distribution.

| Haplotype number | Number of strains | Strain number                                                                                                                                                                                                                                                                          | Countries                        | Agent               |
|------------------|-------------------|----------------------------------------------------------------------------------------------------------------------------------------------------------------------------------------------------------------------------------------------------------------------------------------|----------------------------------|---------------------|
| Hap1             | 19                | MF179511, AY857512, EU938600, EU938581, , KX434639, KX434635, KX434636, KX434637, KX434638, KX434641, EU938583, EU938579, AY366928, MF179511AY366926, EU938580, KP132195, KC283184, KC614700                                                                                           | Brazil, China, USA, Cuba, Poland | <i>F. monophora</i> |
| Hap2             | 1                 | KX434631                                                                                                                                                                                                                                                                               | Brazil                           | <i>F. monophora</i> |
| Hap3             | 1                 | KX434632                                                                                                                                                                                                                                                                               | Brazil                           | <i>F. monophora</i> |
| Hap4             | 1                 | KX434640                                                                                                                                                                                                                                                                               | Brazil                           | <i>F. monophora</i> |
| Hap5             | 3                 | EU938582, EU938548, KP132194                                                                                                                                                                                                                                                           | Brazil                           | <i>F. monophora</i> |
| Hap6             | 5                 | FJ785471, KP132193, KY303869, KM225277, KY310638                                                                                                                                                                                                                                       | India, Guinea                    | <i>F. monophora</i> |
| Hap7             | 1                 | EU938584                                                                                                                                                                                                                                                                               | USA                              | <i>F. monophora</i> |
| Hap8             | 1                 | EU285268                                                                                                                                                                                                                                                                               | China                            | <i>F. monophora</i> |
| Hap9             | 2                 | EU285270, EU285273                                                                                                                                                                                                                                                                     | China                            | <i>F. monophora</i> |
| Hap10            | 1                 | MH382090                                                                                                                                                                                                                                                                               | Brazil                           | <i>F. monophora</i> |
| Hap11            | 1                 | MH382084                                                                                                                                                                                                                                                                               | Brazil                           | <i>F. monophora</i> |
| Hap12            | 1                 | KX434639                                                                                                                                                                                                                                                                               | Brazil                           | <i>F. monophora</i> |
| Hap13            | 28                | KC886421, KP132197, JQ906791, JN418760, JQ906793, JN418762, FJ595996, EF513771, EF513770, EF513769, EF513766, EF513765, EF513764, EF513761, KX078402, KX078386, EU285269, KX078401, KX078389, KX078388, EU285272, KX078380, KX078398, KX078399, KX078394, KX078387, KX078395, KX078392 | China                            | <i>F. monophora</i> |
| Hap14            | 1                 | EF513768                                                                                                                                                                                                                                                                               | China                            | <i>F. monophora</i> |
| Hap15            | 1                 | KM396287                                                                                                                                                                                                                                                                               | Malaysia                         | <i>F. monophora</i> |

|       |    |                                                                                                                                                                                                                                                                                                                                                                                                                                                                                                                                                                                                                                                                                                                            |                                     |                     |
|-------|----|----------------------------------------------------------------------------------------------------------------------------------------------------------------------------------------------------------------------------------------------------------------------------------------------------------------------------------------------------------------------------------------------------------------------------------------------------------------------------------------------------------------------------------------------------------------------------------------------------------------------------------------------------------------------------------------------------------------------------|-------------------------------------|---------------------|
| Hap16 | 14 | KX078391, KX078397, KX078393, KX078382, EF513767, EF513760, EF513762, EF513763, EF513759, KX078400, KX078378, KX078390, KX078385, JN629041                                                                                                                                                                                                                                                                                                                                                                                                                                                                                                                                                                                 | China                               | <i>F. monophora</i> |
| Hap17 | 2  | AY366926, AY366986                                                                                                                                                                                                                                                                                                                                                                                                                                                                                                                                                                                                                                                                                                         | Brazil                              | <i>F. monophora</i> |
| Hap18 | 1  | EU938579                                                                                                                                                                                                                                                                                                                                                                                                                                                                                                                                                                                                                                                                                                                   | Brazil                              | <i>F. monophora</i> |
| Hap19 | 1  | AY366928                                                                                                                                                                                                                                                                                                                                                                                                                                                                                                                                                                                                                                                                                                                   | Brazil                              | <i>F. monophora</i> |
| Hap20 | 1  | KC886423                                                                                                                                                                                                                                                                                                                                                                                                                                                                                                                                                                                                                                                                                                                   | Brazil                              | <i>F. pedrosoi</i>  |
| Hap21 | 2  | KX434682, KU881745                                                                                                                                                                                                                                                                                                                                                                                                                                                                                                                                                                                                                                                                                                         | Brazil                              | <i>F. pedrosoi</i>  |
| Hap22 | 70 | KX434642, KR732301, KR732303, KR732304, KR732305, KX434643, KX434644, KX434645, KX434646, KX434647, KX434648, KX434649, KX434650, KX434651, KX434652, KX434653, KX434654, KX434655, KX434656, KX434657, KX434658, KX434659, KX434660, KX434661, KX434662, KX434663, KX434664, KX434665, KX434666, KX434667, KX434668, KX434669, KX434670, KX434671, KX434672, KX434673, KX434674, KX434675, KX434676, KX434677, KX434678, KX434679, KX434704, KX434680, KX434681, KX434682, KX434683, KX434684, KX434685, KX434686, KX434687, KX434688, KX434689, KX434690, KX434691, KX434692, KU881736, KU881744, KX434710, KX434717, KX434711, KX434712, KX434713, KX434714, AY366918, AY366920, AY366913, EU938588, EU938586, EU938587 | Brazil, Argentina, Lybia, Venezuela | <i>F. pedrosoi</i>  |
| Hap23 | 7  | KX434693, KX434694, KX434695, KX434696, KX434697, KX434698, KX434699                                                                                                                                                                                                                                                                                                                                                                                                                                                                                                                                                                                                                                                       | Brazil                              | <i>F. pedrosoi</i>  |

|       |   |                                                                         |             |                    |
|-------|---|-------------------------------------------------------------------------|-------------|--------------------|
| Hap24 | 1 | KX434700                                                                | Brazil      | <i>F. pedrosoi</i> |
| Hap25 | 1 | KX434709                                                                | Brazil      | <i>F. pedrosoi</i> |
| Hap26 | 1 | AY366919                                                                | Brazil      | <i>F. pedrosoi</i> |
| Hap27 | 1 | KX434702                                                                | Brazil      | <i>F. pedrosoi</i> |
| Hap28 | 1 | KX434704                                                                | Brazil      | <i>F. pedrosoi</i> |
| Hap29 | 1 | KX434705                                                                | Brazil      | <i>F. pedrosoi</i> |
| Hap30 | 1 | KX434720                                                                | Brazil      | <i>F. pedrosoi</i> |
| Hap31 | 1 | KX434721                                                                | Brazil      | <i>F. pedrosoi</i> |
| Hap32 | 1 | KX434678                                                                | Brazil      | <i>F. pedrosoi</i> |
| Hap33 | 1 | AY366912                                                                | -           | <i>F. pedrosoi</i> |
| Hap34 | 1 | AY366915                                                                | Puerto Rico | <i>F. pedrosoi</i> |
| Hap35 | 1 | AY366921                                                                | Uruguay     | <i>F. pedrosoi</i> |
| Hap36 | 1 | KX434701                                                                | Brazil      | <i>F. pedrosoi</i> |
| Hap37 | 1 | KX434703                                                                | Brazil      | <i>F. pedrosoi</i> |
| Hap38 | 1 | KC886422                                                                | Brazil      | <i>F. pedrosoi</i> |
| Hap39 | 2 | KU892412, KU881735                                                      | Brazil      | <i>F. nubica</i>   |
| Hap40 | 1 | KX084063                                                                | China       | <i>F. nubica</i>   |
| Hap41 |   | KF155217, KP132198, MF038001, KX084064,<br>KX078407, KX078410, KX078404 | China       | <i>F. nubica</i>   |
| Hap42 | 1 | KX078408                                                                | China       | <i>F. nubica</i>   |
| Hap43 | 1 | KU885982                                                                | China       | <i>F. nubica</i>   |
| Hap44 | 1 | KX084065                                                                | China       | <i>F. nubica</i>   |
| Hap45 | 1 | AY366931                                                                | Suriname    | <i>F. nubica</i>   |
| Hap46 | 1 | EU938592                                                                | Cameroon    | <i>F. nubica</i>   |
| Hap47 | 3 | KP132199, KX084066, KX078409                                            | China       | <i>F. nubica</i>   |
| Hap48 | 1 | KX078403                                                                | China       | <i>F. nubica</i>   |
| Hap49 | 1 | KX078406                                                                | China       | <i>F. nubica</i>   |
| Hap50 | 1 | KX078405                                                                | China       | <i>F. nubica</i>   |
| Hap51 | 1 | EU938589                                                                | Mexico      | <i>F. pedrosoi</i> |

|       |   |           |             |                     |
|-------|---|-----------|-------------|---------------------|
| Hap52 | 1 | MH858792  | Venezuela   | <i>F. pedrosoi</i>  |
| Hap53 | 1 | KU881739  | Brazil      | <i>F. nubica</i>    |
| Hap54 | 1 | EU938591  | Puerto Rico | <i>F. pedrosoi</i>  |
| Hap55 | 1 | EU938590  | Mexico      | <i>F. pedrosoi</i>  |
| Hap56 | 1 | KU892413  | Brazil      | <i>F. pedrosoi</i>  |
| Hap57 | 1 | KU8811742 | Brazil      | <i>F. nubica</i>    |
| Hap58 | 1 | KR706553  | Brazil      | <i>F. pugnacius</i> |
| Hap59 | 1 | EU137319  | Brazil      | <i>F. monophora</i> |
